# Supplementary material
Source: PubMed Central journal article supplement (PMC8649729)
Supplement: mmc1.pdf [file mmc1.pdf]

**Supplemental information**

**SARS CoV-2 Delta variant exhibits enhanced  
infectivity and a minor decrease in neutralization  
sensitivity to convalescent or post-vaccination sera**

**Alona Kuzmina, Seraj Wattad, Yara Khalaila, Aner Ottolenghi, Benyamin Rosental, Stanislav Engel, Elli Rosenberg, and Ran Taube**

## Supplementary Figures and Legends

**Table 1: Convalescent human sera used in this study (related to STAR)**

| Serum | Days post symptoms onset | ELISA IgG Liasonx | NT <sub>50</sub> dilution | Sex/Age | symptoms | Time from disease | Long COVID |
|-------|--------------------------|-------------------|---------------------------|---------|----------|-------------------|------------|
| P1    | 63                       | 8                 | 10000                     | M/45    | +++      | 9 weeks           | +          |
| P3    | 56                       | 37                | 10000                     | F/20    | +        | 8 weeks           |            |
| P4    | 21                       | 0                 | 79.36                     | M/42    | ++       | 3 weeks           | +          |
| P5    | 49                       | 6                 | 250                       | F/35    | +        | 7 weeks           |            |
| P6    | 28                       | 21                | 833.3                     | M/32    | +        | 4 weeks           |            |
| P7    | 21                       | 20                | 10000                     | F/41    | +++      | 3 weeks           | +          |
| P8    | 63                       | 68                | 25000                     | M/67    | ++++     | 9 weeks           | +          |
| P9    | 56                       | 23                | 20000                     | F/39    | ++++     | 8 weeks           | +          |
| P10   | 49                       | 17                | 10000                     | M/48    | ++       | 7 weeks           | +          |
| P11   | 49                       | 11                | 833.3                     | M/48    | ++       | 7 weeks           | +          |

**Table 2: Post vaccination human sera used in this study (related to STAR)**

| Serum  | Days of collection post dose #1 | Days of collection post dose #2 | ELISA IgG | NT <sub>50</sub> dilution | Age/sex | symptoms |
|--------|---------------------------------|---------------------------------|-----------|---------------------------|---------|----------|
| V.1.1  | 21                              |                                 | 79        | 50000                     | F/27    |          |
| V.1.2  | 21                              |                                 | 35        | 33333.3                   | F/69    |          |
| V.1.3  | 21                              |                                 | 63        | 33333.3                   | M/55    |          |
| V.1.4  | 21                              |                                 | 109       | 40000                     | F/30    |          |
| V.1.5  | 21                              |                                 | 119       | 100000                    | F/30    |          |
| V.2.2  |                                 | 10                              | 259       | 200000                    | M/45    |          |
| V.2.3  |                                 | 10                              | 254       | 100000                    | F/41    |          |
| V.2.4  |                                 | 10                              | 190       | 100000                    | F/58    |          |
| V.2.5  |                                 | 10                              | 156       | 64000                     | F/64    |          |
| V.2.6  |                                 | 10                              | 400       | 128000                    | F/40    |          |
| V.2.7  |                                 | 9                               | 223       | 83333.3                   | F/54    |          |
| V.2.8  |                                 | 12                              | 326       | 83333.3                   | F/69    |          |
| V.2.9  |                                 | 10                              | 341       | 83333.3                   | F/55    |          |
| V.2.10 |                                 | 9                               | 211       | 50000                     | F/22    |          |
| V.2.11 |                                 | 10                              | 222       | 100000                    | F/46    |          |
| V.2.12 |                                 | 12                              |           |                           | M/58    |          |
| V.2.13 |                                 | 8                               |           |                           | F/43    |          |
| V.2.14 |                                 | 36                              |           |                           | M/29    |          |
| V.2.15 |                                 | 30                              |           |                           | F/30    |          |
| V.2.16 |                                 | 36                              |           |                           | M/56    |          |

|        |  |    |  |  |      |  |
|--------|--|----|--|--|------|--|
| V.2.17 |  | 34 |  |  | M/28 |  |
| V.2.18 |  | 44 |  |  | M/29 |  |
| V.2.19 |  | 39 |  |  | M/25 |  |
| V.2.20 |  | 34 |  |  | M/55 |  |
| V.2.21 |  | 35 |  |  | F/27 |  |

The study was conducted in compliance with ethical principles of the Declaration of Helsinki and approved by the Soroka Medical Center Institutional Review Board (**protocol 0281-20-SOR**). Sera samples drawn (P samples; n=10) from COVID19 recovered individuals were collected at the indicated time points post onset of disease symptoms and screened by SARS-CoV-2 IgG Liasonx ELISA for specific SARS-CoV-2 IgG. Similarly, sera samples drawn from individuals that were vaccinated with the BNT162b2 Pfizer vaccine were also collected at 3 weeks post first dose (V.1 samples; n=5), or 9 days post the second dose (V.2 samples; n=20). Samples were then monitored by neutralization assays against wild-type or spike mutated SARS-CoV pseudoviruses. (+) symbol represent disease symptoms severity. Long COVID19 are patients that had disease symptoms long after disease onset. No effect of gender and sex was detected. Abbreviation: M - male; F- female

## Fig S1: Staining of TRMPSS2 stable cells

Related to Figure 3C

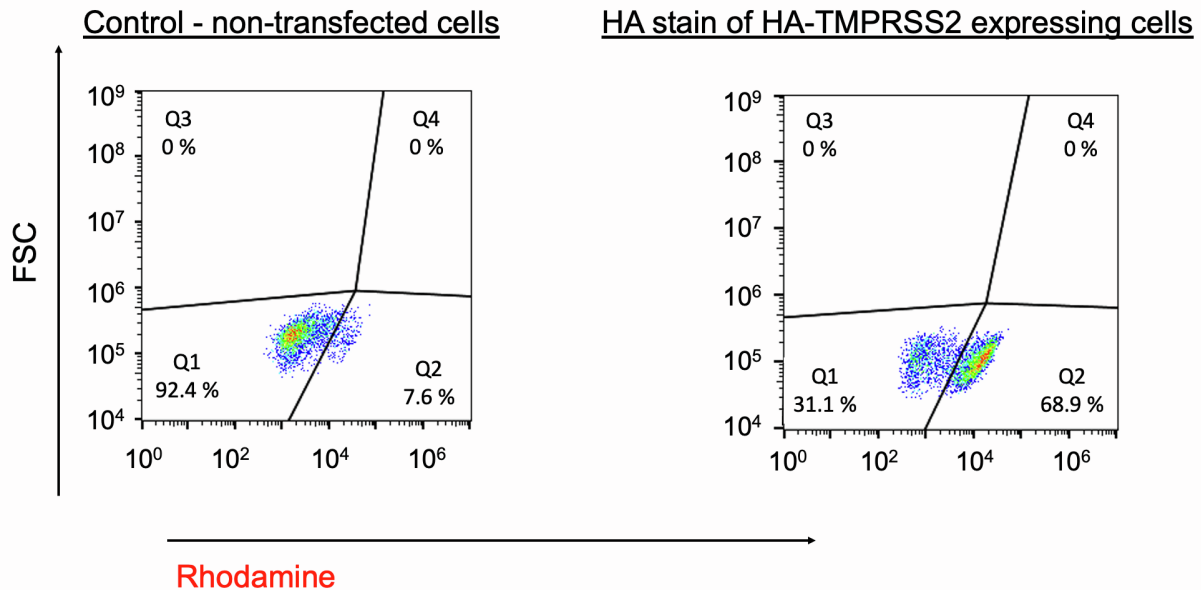

Control HEK-293 non-transfected cells and cells that stably express TMPRSS2-HA were dissociated by EDTA treatment, and washed with PBS-0.01% Triton washing buffer. Cells were then incubated with 0.04% triton for 10 min on ice, washed and blocked with 4% FCS in PBS. Cells were then incubated with anti-HA IgG (5  $\mu$ g/ml, Abcam ab9110) for 45 min on ice. After x3 washes with washing buffer, the cells were incubated with Rhodamine-Red labeled goat anti-Rabbit IgG antibody (1:200; Jackson 111-296-003), washed x3 times with washing buffer and analyzed by FACS.
